# Larger, but not better, implicit motor adaptation ability inherent in medicated Parkinson's disease patients: a smart-device-based study

**Ken Takiyama<sup>1</sup>, Takeshi Sakurada<sup>2,3</sup>, Masahiro Shinya<sup>4</sup>, Takaaki Sato<sup>5</sup>, Hirofumi Ogihara<sup>6</sup>, Taiki Komatsu<sup>7</sup>**

<sup>1</sup>Tokyo University of Agriculture and Technology, Department of Electrical Engineering and Computer Science, 2-24-16, Nakacho, Koganei Tokyo, Japan,

<sup>2</sup>Ritsumeikan University, College of Science and Engineering, 1-1-1, Nojihigashi, Kusatsu, Shiga, Japan,

<sup>3</sup>Jichi Medical University, Department of Neurosurgery, 3311-1, Yakushiji, Shimotsuke, Tochigi, Japan,

<sup>4</sup>Hiroshima University, Graduate School of Integrated Arts and Sciences, 1-7-1, Kagamiyama, Higashi-Hiroshima, Japan,

<sup>5</sup>Kekeyu Hospital, 1308, Kekeyuonsen, Ueda, Nagano, Japan,

<sup>6</sup>Japan University of Health Sciences, Department of physical therapy, 2-555, Hirasuka, Saitama, Japan,

<sup>7</sup>Nihon University, College of Sports Science, 3-34-1 Shimouma, Setagaya Tokyo, Japan,

Correspondence should be addressed to K.T. ([t.j.ken.takiyama@gmail.com](mailto:t.j.ken.takiyama@gmail.com)).

## Abstract

1

2 Generating appropriate motor commands is an essential brain function. To achieve proper motor control  
3 in diverse situations, predicting future states of the environment and body and modifying the prediction  
4 are indispensable. The internal model is a promising hypothesis about brain function for generating and  
5 modifying the prediction. Although several findings support the involvement of the cerebellum in the  
6 internal model, recent results support the influence of other related brain regions on the internal model.  
7 A representative example is the motor adaptation ability in Parkinson's disease (PD) patients. Although  
8 this ability provides some hints about how dopamine deficits affect the internal model, previous findings  
9 are inconsistent; some reported a deficit in the motor adaptation ability in PD patients, but others  
10 reported that the motor adaptation ability of PD patients is comparable to that of healthy controls. A  
11 possible factor causing this inconsistency is the difference in task settings, which yield different cognitive  
12 strategies in each study. Here, we demonstrate a larger, but not better, motor adaptation ability in PD  
13 patients than healthy controls while reducing the involvement of cognitive strategies and concentrating  
14 on implicit motor adaptation abilities. This study utilizes a smart-device-based experiment that enables  
15 motor adaptation experiments anytime and anywhere with less cognitive strategy involvement. The PD  
16 patients showed a significant response to insensible environmental changes, but the response was not  
17 necessarily suitable for adapting to the changes. Our findings support compensatory or paretic cerebellar  
18 functions in PD patients from the perspective of motor adaptation.

## 19 1 Introduction

20 Motor adaptation is an essential brain function that modifies motor commands to achieve desired move-  
21 ments in novel situations, such as learning to use new tools or correcting a movement error. A promising  
22 hypothesis about motor adaptation is the internal model hypothesis, which considers the cerebellum to  
23 play a role not only in predicting future states of the environment and the body but also in modifying  
24 the prediction [1]. Appropriate motor commands can be generated through the outcome predicted by the  
25 internal model. To investigate the ability to update the internal model, a motor adaptation paradigm  
26 is used [2,3]. In this paradigm, the environment changes through artificially applied perturbations. The  
27 subjects thus need to update their internal models to achieve the desired movements while compensating  
28 for the perturbation.

29 The cerebellum can play crucial roles in the internal model [1], which has been supported via deficit  
30 motor adaptation abilities in cerebellar ataxia patients [4,5]. In addition to the cerebellar ataxia pa-  
31 tients, Parkinson’s disease (PD) patients also showed impaired sensorimotor adaptation abilities, such as  
32 adapting to 90 degree visuomotor rotation [6] or adapting to three-dimensional arm-reaching movements  
33 [7]. PD, the second most common degenerative neurological disease, causes a lack of dopamine neurons  
34 in the substantia nigra pars compacta. Due to the impaired motor adaptation ability in PD patients,  
35 the internal model can be affected by not only the cerebellum but also other brain regions. The motor  
36 adaptation ability in PD patients can provide some hints to deepen our knowledge about the internal  
37 model.

38 To investigate the motor adaptation ability inherent in PD patients, previous studies relied on a  
39 constant amount of perturbation that was applied abruptly at a specific time (we refer to this type of  
40 perturbation as abrupt perturbation hereafter). To adapt to the abrupt perturbation, subjects tend to  
41 rely on explicit strategies or their cognitive abilities [8,9]. For example, when the perturbation was 90  
42 degree visuomotor rotation that caused a 90 degree deviation in the movement angle between the actual  
43 and perturbed movements, it was possible to achieve the desired movements by aiming at the 90 degree  
44 location distant from a target. With an abrupt perturbation, subjects tend to notice the onset of the  
45 perturbation or task switching [9-11]. In the motor adaptation to the abrupt perturbation, it is difficult  
46 to determine whether the impaired sensorimotor adaptation in PD patients is caused by their cognitive  
47 abilities (i.e., the influence of the task switch) or adaptation abilities.

48 In contrast to the adaptation to an abrupt perturbation, PD patients showed a compatible adaptation  
49 ability with the healthy elderly individuals in responding to a gradually applied visuomotor transformation  
50 (we refer to this type of perturbation as a gradual perturbation hereafter) [12,13]. In contrast to abrupt  
51 perturbations, a striking feature of gradual perturbations is their difficulty in being noticed [9-11,14,15].  
52 A task switch can thus be related to an adaptation to the abrupt perturbation and not to an adaptation  
53 to the gradual perturbation. The influence of the task switch can be a candidate for interpreting the  
54 compatible adaptation ability of PD patients with healthy elderly individuals in adapting to only the  
55 gradual perturbation.

56 Additional support for the influence of task switching on motor adaptation in PD patients is the  
57 lack of savings in PD patients. Young individuals and healthy elderly individuals show faster learning in  
58 relearning trials than in the initial learning trials, such as in the A-B-A paradigm, which is referred to as  
59 savings [16-18]. In contrast, PD patients do not exhibit savings [19,20]. Because task switching can lead  
60 to savings, the adaptation ability inherent in PD patients can be influenced by task switching.

61 Because task switching is a candidate in affecting the motor adaptation ability in PD patients, it is  
62 necessary to exclude the influence of task switching in detail. Although a gradual perturbation can involve  
63 less task switching than an abrupt perturbation, previous studies used 60 degree visuomotor rotation [12]  
64 or a 7.8 cm transformation in 10 cm arm-reaching movements in total [13]. These perturbations can  
65 involve the influence of task switching because the aiming direction can deviate from the target location  
66 even if the gradual perturbation involves more than a 45 degree visuomotor rotation (Fig. 3 in [9]). It  
67 is thus still unclear whether the adaptation ability is still compatible between PD patients and elderly

68 individuals because the task switch can be involved in a gradual perturbation with a large amplitude.

69 Here, we investigated the motor adaptation ability of PD patients while decreasing the influence of  
70 the task switch as much as possible. To reduce the influence of the task switch, we relied on a gradually  
71 applied perturbation whose existence was noticeable by 1 out of the 82 participants in our previous study  
72 [11]; the visuomotor rotation changed by one degree in each trial, and the maximum value of the rotation  
73 was 15 degrees. Based on a previous study, task switches are less involved in gradually applied 15 degree  
74 visuomotor rotation than in gradually applied 45 degree visuomotor rotation [9]. We demonstrate that  
75 the PD patients showed a larger, but not better, motor adaptation ability than elderly individuals and  
76 young individuals, rather than a compatible or impaired ability.

77 In addition to reducing the influence of the task switch, we also decreased the burden to participate  
78 in the motor adaptation experiments. Almost all the previous experiments on motor adaptation relied  
79 on manipulanda or pen tablet settings. These settings require the subjects to travel to the laboratory,  
80 which can be a burden, especially for patients, to participate in the experiments. To minimize this  
81 burden, we utilize a smart-device-based experimental setting that is available to conduct motor adap-  
82 tation experiments anytime and anywhere [11]. Smart-device-based experiments have been proposed to  
83 conveniently investigate motor adaptation or visuomotor abilities for flexible applications [21,22]. Our  
84 smart-device-based setting has been validated under several conditions and by comparing it to a conven-  
85 tional experimental setting with manipulanda [11]. We refer to our experimental setting as the PORTable  
86 Motor learning LABORatory (PoMLab). The PoMLab can decrease the burden for the participants, PD  
87 patients, elderly individuals, and young individuals by removing the need to go to a specific place at a  
88 particular time. In this study, we demonstrate a larger, but not better, motor adaptation inherent in PD  
89 patients using our PoMLab setting.

## 90 2 Methods

### 91 2.1 Participants

92 Fifty-four subjects participated in the current study; their ages and sexes are summarized in Table 1.  
93 This study was approved by the ethics committees of the Tokyo University of Agriculture and Technology,  
94 Jichi Medical University, and Keio University. The PoMLab experiments were conducted while each  
95 participant was seated on a chair and an experimenter was present and close to the participant. The  
96 participants provided written informed consent to participate in this study.

**Table 1.** Attributes of the participants. The "p-values" in this table indicate the p-values from a two-sample t-tests between the PD patients and the elderly individuals. "M" and "F" under sex indicate male and female, respectively. All the values in this table denote the means  $\pm$  standard deviations.

|                 | PD patients       | Elderly individuals | p-value | Young individuals |
|-----------------|-------------------|---------------------|---------|-------------------|
| Age             | 70.06 $\pm$ 7.34  | 75.67 $\pm$ 12.70   | 0.1138  | 21.33 $\pm$ 1.50  |
| UPDRS           | 26.06 $\pm$ 12.07 | N/A                 | N/A     | N/A               |
| H & Y           | 2.67 $\pm$ 0.69   | N/A                 | N/A     | N/A               |
| MMSE            | 27.78 $\pm$ 2.07  | 27.72 $\pm$ 2.45    | 0.9418  | N/A               |
| Duration (year) | 6.72 $\pm$ 4.32   | N/A                 | N/A     | N/A               |
| Sex             | M=9, F=9          | M=8, F=10           | N/A     | M=16, F=2         |

97 The PD patients were outpatients satisfying the following inclusion criteria. The elderly individuals  
98 were inpatients with broken lower-limb bones that did not disturb performance in our study. The young  
99 individuals were volunteers. All of the participants were naive to the purpose of the study.

100 The PD patients were clinically evaluated based on the Unified Parkinson’s Disease Rating Scale  
101 (UPDRS) [23] and the adapted version of the Hoehn and Yahr scale (H&Y) [24]. The Mini-Mental  
102 State Examination (MMSE) score was used to evaluate cognitive abilities. Table 1 summarizes the ages,  
103 UPDRS scores, H&Y scores, MMSE scores, duration, and sex in each group, if available.

## 104 2.2 Inclusion criteria

105 PD patients and elderly individuals whose MMSE scores were greater than 22 [no significant differ-  
106 ence, two-sample t-test  $p=0.9418$ ], indicating no severe cognitive decline, were included in the study.  
107 Furthermore, the included PD patients were on a medication, resulting in no tremor. There were no mus-  
108 culoskeletal and visual impairments that inhibited performing the required tasks in the current study.

## 109 2.3 Smart device

110 We used an Android tablet (Nexus 9, HTC, Taipei City, Taiwan,  $2048 \times 1536$  pixels,  $228.25 \times 153.68 \times$   
111  $7.95$  mm screen size, and 436 g weight) throughout our experiments.

## 112 2.4 PoMLab application

113 The PoMLab application was developed using a personal edition of Unity (version 5.2). The PoMLab  
114 application is available on our GitHub page (<https://github.com/masahiroshinya/PoMLab>).

## 115 2.5 PoMLab settings

116 The cursor position on the tablet display ( $d_x, d_y$ ) that was controlled by participants was determined as  
117 follows. First, the cursor position in the tablet coordinate system, ( $p_x, p_y$ ), was determined based on the  
118 measured acceleration of the tilting motions in the x- and y-axes of the tablet coordinate system ( $a_x,$   
119  $a_y$ ) through a low-pass filter;  $p_x = 0.95p_x + 0.05 \arcsin(a_x) - o_x$  and  $p_y = 0.95p_y + 0.05 \arcsin(a_y) - o_y$ ,  
120 where  $o_x$  and  $o_y$  are offsets to determine the initial cursor position in each trial ( $o_x = 0$  and  $o_y = -30$ ).  
121 The  $a_x$  and  $a_y$  were sampled at 200 Hz. The cursor position in the accelerometer coordinate system was  
122 transformed into the position on the tablet display ( $d_x, d_y$ ) by multiplying by the rotation matrix  $R$ ;  
123  $(d_x, d_y)^T = R(p_x, p_y)^T$ , where  $()^T$  denotes the transpose of the vector. Without any visuomotor rotation,  
124 the cursor position in the accelerometer coordinate system corresponded to that in the display coordinate  
125 system. In the  $t$ th learning trial, visuomotor rotation was applied through the rotation angle  $p_t$ . The  
126 detailed settings and validations of PoMLab are provided in our previous study [11] and our code is  
127 available on GitHub (<https://github.com/masahiroshinya/PoMLab>).

## 128 2.6 Experimental procedures

129 The required task was to tilt the held tablet device appropriately. Corresponding to the tilting motion,  
130 the cursor displayed on the tablet moved (a yellow circle with a 4.5 mm radius on the Nexus 9). The  
131 participants were instructed to move the cursor toward the visually instructed target (a purple circle with  
132 a 4.5 mm radius on the Nexus 9) also on the display in a straightforward manner within two seconds  
133 (Fig. 1A). At the beginning of each trial, the subjects needed to tilt the tablet to set the cursor at the  
134 initial position in the center of the tablet screen (a blue circle with a 9.0 mm radius on the Nexus 9)  
135 for 1 second. After 1 second, the color of the initial position changed from blue to red, and the target  
136 appeared. Because the target was displayed for two seconds, the subjects needed to tilt the tablet to  
137 hit the target within these two seconds. The cursor, target, and initial position were displayed on the  
138 tablet screen, and the cursor moved according to the tilting motion, which enabled the motor adaptation  
139 experiments to be conducted solely with the tablet device.

140 The subjects participated in 20 practice trials and 80 learning trials. In the first 20 practice trials, the  
141 target position was pseudorandomly set to either 60, 75, 90, 105, or 120 degrees without any visuomotor  
142 rotation (90 degrees indicated the 12 o'clock position on the tablet display). In the following 80 learning  
143 trials, the target position was fixed at 90 degrees. The learning trials were divided into two parts. In  
144 the first 40 learning trials, the subjects experienced gradually increasing and vanishing clockwise (CW)  
145 perturbation. In the latter 40 trials, the subjects underwent counterclockwise (CCW) perturbation.  
146 Half of the participants experienced the CW perturbation first, and the other half of the participants  
147 experienced the CCW perturbation first. No subjects were aware of the existence of the perturbation.  
148 The experiment typically took less than 30 minutes.

## 149 2.7 Evaluation of the learning effects

150 The learning effects were evaluated depending on the movement angles of the cursor when the velocity  
151 on the y-axis reached its peak value (Fig. 1B). The movement trajectories are displayed in Fig. 1A  
152 after the movement started. The onsets were detected when the velocity along the y-axis on the display  
153 exceeded the mean + 2.5 times the standard deviation calculated in each trial. To avoid evaluating  
154 outliers, movement angles in each trial were excluded when these exceeded  $(15 + p_t)$  when  $p_t \geq 0$  or  $(-15$   
155  $+ p_t)$  otherwise. There was no significant difference in the number of excluded trials between the PD  
156 patient group [ $3.38 \pm 2.96$  out of 80 trials] and the elderly group [ $4.50 \pm 4.76$  out of 80 trials] ( $p=0.6053$ ) and  
157 between the PD patient group and the young group [ $1.61 \pm 2.20$  out of 80 trials] ( $p=0.2830$ ). There was  
158 a significant difference between the elderly and young groups ( $p=0.0413$ ). We confirmed the invariance  
159 of the following results when the exclusion criteria were  $(c + p_t)$  when  $p_t > 0$  or  $(-c + p_t)$  otherwise  
160 with  $c = 11.5, 12, 13, 14, 16, 20, \text{ or } 25$ . When  $c$  was less than 11.5, at least one participant in each group  
161 showed outliers in the same trial(s) with  $p_t < 0$  and  $p_t > 0$ . This disturbed the analysis for the age- and  
162 MMSE-matched participants in the PD and elderly groups. We thus focused on the case when  $c > 11.5$ ,  
163 especially when  $c = 15$ , throughout this study.

## 164 2.8 Data analysis

165 Because outliers were detected in some trials based on the abovementioned criteria, learning effects were  
166 averaged across the CW and the CCW conditions in each subject to exclude the effects of the outliers.  
167 There were no outliers at the same trials in the CW and the CCW conditions in all the subjects; the  
168 averaged learning effects could be reasonably discussed across all the subjects. Because the effects in the  
169 CW conditions took positive values and those in the CCW conditions took negative values, we averaged  
170 those by multiplying -1 to the learning effects in the CCW condition. If there were outliers at the  $k$ th  
171 trial in a subject in the CW condition, for example, the learning effects at the  $k$ th trial corresponded to  
172 that in the CCW condition.

173 The averaged learning effects of the  $i$ th subject,  $x_i = (x_{1,i}, \dots, x_{40,i})$ , were decomposed into three  
174 parameters: the temporal delay  $\Delta_i (\Delta_i \geq 0)$ , the amplitude  $A_i (A_i \geq 0)$ , and the phase  $\phi_i$ . The temporal  
175 delay was calculated by temporally sliding the fragments of  $x_i$ ,  $x_i(\Delta_i) = (x_{9+\Delta_i,i}, \dots, x_{32+\Delta_i,i})$ , to min-  
176 imize the squared error from the fragments of the perturbation sequence  $p = (p_9, \dots, p_{32})$ . The squared  
177 error between the learning effects and the perturbation is hereafter referred to as the task error. We chose  
178 these fragments because the fragments of  $x_i$  in the PD group were significantly different from 0 when the  
179 trial number was between 12 and 35 (i.e.,  $x_i = (x_{12,i}, \dots, x_{35,i})$  were significantly different from 0, t-test  
180  $p < 0.01$  [corrected]) and the squared error between the averaged fragments of the learning curve in the  
181 PD patients and the fragments of the perturbation sequence took its minimal value when the fragments  
182 were chosen to be  $(p_9, \dots, p_{32})$ .

183 After determining  $\Delta_i^*$  as  $\Delta_i^* = \arg \min_{\Delta_i} (\frac{1}{24} \sum_{j=9}^{32} (x_{j+\Delta_i,i} - p_j)^2)$ , we calculated the amplitude  $A_i$   
184 as  $A_i = \frac{|x_i(\Delta_i^*)|}{|p|}$  and the phase  $\phi_i$  as  $\phi_i = \arccos \frac{x_i(\Delta_i^*) \cdot p}{|x_i(\Delta_i^*)| |p|}$ , where  $|x_i(\Delta_i^*)| = \sqrt{x_{9+\Delta_i^*}^2 + \dots + x_{32+\Delta_i^*}^2}$

185 indicates the norm of  $x_i(\Delta_i^*)$ ,  $|p| = \sqrt{p_9^2 + \dots + p_{32}^2}$  indicates the norm of  $p$ , and  $x_i(\Delta_i^*) \cdot p = x_{9+\Delta_i^*} p_9 +$   
186  $\dots + x_{32+\Delta_i^*} p_{32}$  indicates the inner product of  $x_i(\Delta_i^*)$  and  $p$ .  $\Delta_i$  indicates the temporal delay with which  
187 each subject minimizes the task error according to the imposed perturbation.  $A_i$ , the amplitude of  
188 learning effects, indicates the response strength to the applied perturbation.  $\phi_i$  indicates the similarity  
189 between the learning effects and the applied perturbation sequence. To quantify the similarity between  
190 the learning effect and the perturbation while considering the amplitude, the phase, and the temporal  
191 delay together, we calculated the root-mean-squared error,  $\text{RMSE}_i = \sqrt{\frac{1}{24} \sum_{j=9}^{32} (x_{j+\Delta_i^*,i} - p_j)^2}$ . To  
192 quantify the trajectories, we calculated the trajectory error as the sum of the lateral deviations within  
193 each trial:  $\text{TE}_i = \frac{1}{T} \sum_{f=1}^T d_{x,f}$ , where  $d_{x,f}$  indicates the x-position in the display coordinate system at  
194 the  $f$ th time frame and  $T$  indicate the total number of time frames within the trial. We calculated these  
195 five variables (i.e.,  $\Delta_i^*$ ,  $A_i$ ,  $\phi_i$ ,  $\text{RMSE}_i$ , and  $\text{TE}_i$ ) throughout the current study.

## 196 2.9 Statistical analysis

197 We utilized one-way ANOVA with a group factor (patients with PD, elderly individuals, and young  
198 individuals), followed by Tukey's post hoc tests to compare each group if there was no specified notification  
199 about statistical test. We used MATLAB 2016b (Mathworks, Nantick MA) for all statistical analyses.

## 200 3 Results

201 Eighteen PD patients, eighteen age- and MMSE-matched elderly individuals, and eighteen university  
202 students (referred to as young individuals in the following) adapted to visuomotor rotation through the  
203 PoMLab setting using a tablet device (the age distributions and clinical scores are summarized in Table  
204 1). Figs. 1A and 1B indicate the cursor trajectories and velocities along the y-axis, respectively, in  
205 the learning trials averaged across all the subjects in each group. In those figures, the solid green lines  
206 indicate participants in the PD patient group, the solid blue lines indicate those in the elderly group, and  
207 the solid black lines indicate those in the young group.

208 We defined the learning effects as the movement angle at the time when the velocity along the y-axis  
209 took its peak value in each trial. Because we focused on the adaptation to the visuomotor rotation  
210 for which the subjects needed to compensate for the perturbation in the movement angles, the angles  
211 were typical values for the discussion of motor adaptation. The movement angles are thus referred to as  
212 learning effects hereafter. The angles of visuomotor rotation  $p_t$  at the  $t$ th trial or visuomotor rotation  
213 itself are referred to as perturbations hereafter. Although the adaptation to the perturbation can consist  
214 of an explicit component (i.e., cognitive ability) and an implicit component (i.e., adaptive component in  
215 motor domain) [8,9], we instructed the participants to aim at the target straightforwardly, which enabled  
216 us to exclude the explicit components [8,9]. In addition, no participant was aware of the existence of the  
217 perturbation, suggesting that the following results mainly consisted of implicit components rather than  
218 explicit components.

219 The learning effects showed between-trial variation depending on the between-trial varying perturba-  
220 tion (Fig. 1C). The shaded area in Fig. 1C denoted the trial numbers (trials 12-35) when the learning  
221 effects of PD patients were significantly different from 0 (t-test  $p < 0.01$  [corrected]). We compared the  
222 learning effects averaged across the trials denoted by the shaded area in each subject (Fig. 1D). There was  
223 a significant group effect ( $F(2,51) = 6.75$ ,  $p = 0.0025$ ), indicating the difference among the PD patients,  
224 elderly individuals, and young individuals. There was a significant difference in the learning effects be-  
225 tween the PD patients [ $8.25 \pm 0.51$ , mean  $\pm$  s.e.m., standard error of the mean] and the elderly individuals  
226 [ $6.65 \pm 0.31$ ] ( $p = 0.0184$ ) and between the PD patients and the young individuals [ $6.28 \pm 0.36$ ] ( $p = 0.0032$ ).  
227 However, there was not a significant difference in the learning effects between the elderly individuals and  
228 the young individuals ( $p = 0.8050$ ). In summary, the PD patients had learning effects approximately 20%  
229 larger than the those of the elderly individuals and those of the young individuals in these measures.



230 In contrast to the learning effects, there was no group effect ( $F(2,51)=1.35$ ,  $p=0.27$ ) and no significant  
231 difference among the three groups ( $p>0.28$ ) in the RMSE (Fig. 1E), the error between the learning effects  
232 and the perturbation (a detailed definition of this metric is in the Methods section). These results indicate  
233 that the PD patients showed more substantial learning effects than the elderly individuals and the young  
234 individuals but a comparable ability to minimize the RMSE.

235 To further study the learning effects, we decomposed the learning effects into three components: the  
236 amplitude  $A$ , to quantify the magnitude of the response to the perturbation; the phase  $\phi$ , to quantify the  
237 similarity between the learning curves and the perturbation; and the temporal delay  $\Delta$ , to quantify the  
238 temporal sensitivity of the response to the perturbation.

239 For the amplitude measurement (Fig. 2A), there was a significant group effect ( $F(2,51) = 6.76$ ,  
240  $p=0.0025$ ), a significant difference between the PD patients [ $0.910\pm 0.050$ ] and the elderly individuals  
241 [ $0.752\pm 0.025$ ] ( $p=0.0162$ ), a significant difference between the PD patients and the young individuals  
242 [ $0.721\pm 0.037$ ] ( $p=0.0034$ ), and no significant difference between the elderly individuals and the young  
243 individuals ( $p=0.842$ ). Fig. 2D shows the learning curves of the representative PD patients who showed  
244 large (solid magenta lines) and small (solid cyan lines) amplitude values. The PD patients showed  
245 an approximately 20% larger response in the amplitude than the elderly individuals and the young  
246 individuals.

247 For the phase measurement (Fig. 2B), there was no significant group effect ( $F(2,51) = 1.16$ ,  $p=0.32$ )  
248 and no significant difference between each group ( $p>0.3104$  among the PD patients [ $0.930\pm 0.009$ ], the  
249 elderly individuals [ $0.906\pm 0.014$ ], and the young individuals [ $0.918\pm 0.008$ ]). Fig. 2E shows the learning  
250 curves of the representative PD patients who showed large (solid magenta lines) and small (solid cyan  
251 lines) phase values. In contrast to the amplitude, the PD patients showed a comparable phase with the  
252 elderly individuals and the young individuals.

253 For the delay (Fig. 2C), there was a significant group effect ( $F(2,51) = 3.62$ ,  $p=0.034$ ), no signifi-  
254 cant difference between the PD patients [ $2.78\pm 0.42$ ] and the elderly individuals [ $4.11\pm 0.65$ ], ( $p=0.18$ ),  
255 a significant difference between the PD patients and the young individuals [ $4.72\pm 0.48$ ] ( $p=0.030$ ), and  
256 no significant difference between the elderly individuals and the young individuals ( $p=0.688$ ). Fig. 2F  
257 shows the learning curves of the representative PD patients who showed large (solid magenta lines) and  
258 small (solid cyan lines) of delay values. The PD patients showed smaller response delays compared to  
259 the young individuals.

260 Taken together, the learning effects of the PD patients were larger than the those of the elderly  
261 individuals and the young individuals (Figs. 1C and 1D, respectively) because the PD patients showed  
262 larger amplitudes compared to the other two groups (Fig. 2A). In addition, a slightly faster response  
263 delay in the PD patients contributed to the large learning effects (Fig. 2C).

264 We further considered other factors that may affect the larger substantial learning effects in PD  
265 patients. A candidate in influencing the learning effects was the movement time. Following previous  
266 studies that reported slower movement times in PD patients than in elderly individuals [25], those patients  
267 also showed slower movement times in our experimental setting than the young individuals (Fig. 3A,  
268 significant group effect,  $F(2,51) = 21.96$ ,  $p=1.32 \times 10^{-7}$ , no significant difference between the PD patients  
269 [ $108.77\pm 6.84$  ms] and the elderly individuals [ $95.77\pm 8.13$  ms],  $p=0.3321$ , a significant difference between  
270 the PD patients and the young individuals [ $51.41\pm 3.27$  ms],  $p=1.93 \times 10^{-7}$ , and a significant difference  
271 between the elderly individuals and the young individuals,  $p=3.11 \times 10^{-5}$ ). To investigate the possible  
272 effects of the movement time on the amplitude, we normalized the movement time within each group  
273 so that the mean and the standard deviation of the movement time in each group equaled 0 and 1,  
274 respectively. After normalization, we calculated the correlation coefficients between the amplitude and  
275 the grouped and normalized movement times. If the movement time affected the learning effects, we could  
276 expect some correlation between these metrics. In contrast to this assumption, there was no significant  
277 correlation between the magnitude and the normalized movement times (Fig. 3B,  $r=0.15$ ,  $p=0.27$ ).  
278 Additionally, there was no correlation between the phase and the normalized movement time ( $r=0.10$ ,

279  $p=0.46$ ), between the lag and the normalized movement time ( $r=-0.15$ ,  $p=0.28$ ). These results indicate  
280 that the movement time was not a significant factor affecting the learning effects.

281 Following previous studies that have reported that PD patients showed a large amount of feedback  
282 response [26] and that the feedback response can be a source of motor adaptation [27], we investigated the  
283 feedback response as another possible factor affecting the learning effects. Fig. 3C shows the relation,  
284 indicated by shaded areas, between the TE during the trials, which is a possible factor reflecting the  
285 feedback response, and the learning effects. There was no significant group effect ( $F(2,51) = 2.58$ ,  
286  $p=0.086$ ) and no significant difference among the three groups (Figs. 3C and 3D,  $p=0.43$  between the  
287 PD patients [ $24.39\pm 0.60$  mm] and the elderly individuals [ $25.42\pm 0.57$  mm],  $p=0.0697$  between the PD  
288 patients and the young individuals [ $26.25\pm 0.57$  mm], and  $p=0.57$  between the elderly individuals and  
289 the young individuals). These results indicate that the feedback response was not a significant factor  
290 affecting the learning effects.

291 We further investigated the relationship between the clinical scores and the learning effects (Fig. 4).  
292 There was no significant correlation between all the recorded attributes and the clinical scores (i.e., age,  
293 duration, H&Y, MMSE, and UPDRS) and the properties of the learning effects (i.e., the amplitude and  
294 the temporal delay) (Fig. 4,  $p>0.102$  for Pearson's correlation coefficient, and  $p>0.208$  for Spearman's  
295 rank correlation coefficient). These results indicate that the recorded attributes and conventional clinical  
296 scores were not enough to explain the large amplitude and the small response delays in PD patients.

## 297 Discussion

298 We investigated the motor adaptation ability inherent in PD patients while decreasing the influence of task  
299 switching and the burden to participate in the experiments. To reduce the influence of task switching, we  
300 utilized a gradual perturbation that was not noticed by most of the participants. To decrease the burden  
301 to participate in the experiments, we used a smart-device-based experiment that enabled us to conduct  
302 the experiments anytime and anywhere. The current study revealed that the PD patients possessed a  
303 motor adaptation ability that was 20% larger, but not better, at minimizing the task errors than the  
304 elderly individuals and the young individuals (Figs. 1C-1E and Fig. 2). The larger adaptation ability  
305 was not related to the slow movement speed of the PD patients (Figs. 3A & 3B), the feedback response  
306 to the perturbation (Figs. 3C & 3D), or the conventional clinical scores (Fig. 4). The larger adaptation  
307 ability originated mostly in the larger amplitude (Fig. 2A) and slightly in the faster response delay (Fig.  
308 2C).

309 A possible factor for the larger motor adaptation ability in the PD patients is compensatory or paretic  
310 cerebellar function [28]. The cerebellum plays essential roles in motor adaptation [1,4]. Cerebellar ataxia  
311 patients have shown deficits in updating the internal model in motor adaptation experiments [1,4,5].  
312 Although it is widely known that PD patients have paretic symptoms related to dopamine or the basal  
313 ganglia, a recent finding supported the possibility that they have a compensatory or paretic cerebellar  
314 functions [28]. The modulation of cerebellar function in PD patients can be supported by the connectivity  
315 between the cerebellum and basal ganglia [29]. Thus, our findings indicate an aspect of the compensatory  
316 or paretic cerebellar function in PD patients, especially in motor adaptation ability.

317 Another possible factor for the larger observed motor adaptation ability in the PD patients is the  
318 reward associated with the motor adaptation task [30,31]. Because the dopamine neurons can encode  
319 reward information, such as the temporal difference error [32,33], the lack of dopamine neurons in the  
320 PD patients can affect motor adaptation through a deficit in encoding the reward information. In several  
321 motor adaptation studies, rewards are associated with accomplishing the performed movements [30,34].  
322 In our experiments, the controlled cursor hit the target before, during, and after adaptation with a high  
323 probability (Fig. 1A). Furthermore, in our previous study, we showed that there was no difference between  
324 the motor adaptation with and without the vibration in hitting the target in healthy young adults, which  
325 was regarded as with and without the reward associated the success of the movement [11]. Thus, we can



326 suggest that our results may originate from compensatory or paretic cerebellar function rather than a  
327 deficit in encoding the reward information.

328 Another possible factor inherent in our findings is the prospective error [18], which is the predicted error  
329 in the upcoming movements. In the framework of the prospective error, the predicted error determines  
330 a recruitment pattern of neural units responsible for generating motor commands. In this framework, the  
331 learning effects when subjects do not predict the prospective error are larger than when they do predict  
332 the error. Without the prediction of the prospective error, the same pattern of neural units is recruited  
333 across all the trials, and the learning effects are embedded in the pattern in a concentrated manner.  
334 With the prediction of the prospective error, a different pattern of neural units is recruited according  
335 to the updated prospective error in each trial, and the learning effects are embedded in several patterns  
336 in a distributed manner. The learning effects embedded in the concentrated population, rather than in  
337 the distributed population, show large learning effects. A possibility inherent in the current finding is  
338 that the PD patients possess an impaired ability to predict the prospective error. In some tasks, the  
339 PD patients show a deficit prospective ability [35]. This hypothesis can also explain the lack of savings  
340 and anterograde interference (a slower learning speed in an interfered task in the A-B paradigm) in PD  
341 patients [19,20].

342 Although the state-space model [36-39] is a popular method to quantify the learning effects in motor  
343 adaptation, it is not appropriate in the current study. In this framework, the task error should be  
344 minimized. In our current setting, the learning effects of PD patients took smaller values than the  
345 perturbation sequence until the 24th trial and larger values from the 25th trial. In this case, the framework  
346 of the state-space model predicted that the learning effects increased in each trial until the 24th trial;  
347 however, in our experimental setting, the leaning effects decreased from the 20th trial. Thus, we did  
348 not apply the state-space model in our current setting. Our findings suggest the need to improve the  
349 state-space model to explain adaptation to gradually applied and vanishing perturbations.

350 Promising future work using PoMLab would be to investigate motor adaptation ability inherent in sev-  
351 eral types of patients, such as stroke patients, cerebellar ataxia patients, and Huntington disease patients,  
352 or the ability associated with autism spectral disorder, schizophrenia, etc. A cross-syndrome comparison  
353 can provide essential knowledge about the neural mechanisms of updating the internal model. Although  
354 several studies have investigated the ability of patients [4,5,26,40], the experimental setting is different  
355 in each study. PoMLab is a cross-platform application and is available for free on our GitHub page  
356 (<https://github.com/masahiroshinya/PoMLab>), which can help researchers, physical therapists, medical  
357 doctors, or anyone conduct motor adaptation experiments. Additionally, PoMLab supports conducting  
358 motor adaptation experiments anytime and anywhere while decreasing the burden to participate in an  
359 experiment.

## 360 Acknowledgments

361 We thank the staff at Kakeyu Rehabilitation Hospital for their kind support for this research. In partic-  
362 ular, we thank Youichi Maruyama and the physical therapists at the hospital. We also thank Shin-ichi  
363 Muramatsu for his help and Shintaro Uehara for his helpful comments.

364 We acknowledge support from the Nakajima Foundation, the Kayamori Foundation of Informational  
365 Science, a Novartis Pharma Research Grant, and Promoting Science (a Grant-in-Aid for Young Scientists  
366 (18K17894), and Grant-in-Aid for Challenging Exploratory Research (16K12988)).

## 367 Additional information

368 Competing interests: The authors declare no competing financial or nonfinancial interests.

## 369 Data availability

370 The datasets analyzed in the current study are available from the corresponding author upon reasonable  
371 request.

## 372 Author contributions

373 K.T. and M.S. designed the experiments and T.S., T.S., and H.O. performed the experiments. K.T.  
374 performed the analyses and wrote the manuscript. T.K. oversaw the manuscript.

## 375 References

- 376 1. Wolpert DM, Miall RC, Kawato M. Internal models in the cerebellum. *Trends in Cog Sci* 2: 338-347.  
377 (1998)
- 378 2. Shadmehr R, Mussa-Ivaldi FA. Adaptive representation of dynamics during learning of a motor task.  
379 *J Neurosci* 14: 3208-3224. (1994)
- 380 3. Krakauer JW, Pine ZM, Ghilardi MF, Ghez C. Learning of visuomotor transformations for vectorial  
381 planning of reaching trajectories. *J Neurosci* 20: 8916-8924. (2000)
- 382 4. Smith MA, Shadmehr R. Intact ability to learn internal models of arm dynamics in Huntington's  
383 disease but not cerebellar degeneration. *J Neurophysiol* 93: 2809-2821. (2005)
- 384 5. Gibo TL, Criscimagna-Hemminger SE, Okamura AM, Bastian AJ. Cerebellar motor learning: are  
385 environment dynamics more important than error size? *J Neurophysiol* 110: 322- 333. (2013)
- 386 6. Contreras-Vidal JL, Buch ER. Effects of Parkinson's disease on visuomotor adaptation. *Exp Brain*  
387 *Res* 150: 25-32. (2003)
- 388 7. Messier J, Adamovich S, Jack D, Hening W, Sage J, Poizner H. Visuomotor learning in immersive 3D  
389 virtual reality in Parkinson's disease and in aging. *Exp Brain Res* 179: 457-474. (2007)
- 390 8. Taylor JA, Krakauer JW, Ivry RB. Explicit and implicit contributions to learning in a sensorimotor  
391 adaptation task. *J Neurosci* 34: 3023-3032. (2014)
- 392 9. Butcher PA, Ivry RB, Kuo SH, Rydz D, Krakauer JW, Taylor JA. The cerebellum does more than  
393 sensory prediction error-based learning in sensorimotor adaptation tasks. *J Neurophysiol* 118: 1622-1636.  
394 (2017)
- 395 10. Kagerer FA, Contreras-Vidal JL, Stelmach GE. Adaptation to gradual as compared with sudden  
396 visuomotor distortions. *Exp Brain Res* 115: 557-561. (1997)
- 397 11. Takiyama K, Shinya M. Development of Portable Motor Learning Laboratory (PoMLab). *PLoS ONE*  
398 11: e0157588. (2016)
- 399 12. Venkatakrisnan A, Banquet JP, Burnod Y, Contreras-Vidal JL. Parkinson's disease differentially  
400 affects adaptation to gradual as compared to sudden visuomotor distortions. *Hum Mov Sci* 30: 760-769.  
401 (2011)
- 402 13. Mongeon D, Blanchet P, Messier J. Impact of Parkinson's disease and dopaminergic medication on  
403 adaptation to explicit and implicit visuomotor perturbations. *Brain and Cog* 81: 271-282. (2013)
- 404 14. Ishii K, Hayashi T, Takiyama K. Influence of switching rule on motor learning. *Sci Rep* 8: 13559.  
405 (2018)
- 406 15. Furuki D, Takiyama K. Decomposing motion that changes over time into task-relevant and task-  
407 irrelevant components in a data-driven manner: application to motor adaptation in whole-body move-  
408 ments. *Sci Rep* 9: 7246. (2019)
- 409 16. Krakauer JW, Ghez C, Ghilardi MF. Adaptation to visuomotor transformations: consolidation,  
410 interference, and forgetting. *J Neurosci* 25: 473-478. (2005)
- 411 17. Smith MA, Ghazizadeh A, Shadmehr R. Interacting adaptive processes with different timescales  
412 underlie short-term motor learning. *PLoS Biol* 4: e179. (2006)

- 413 18. Takiyama K, Hirashima M, Nozaki D. Prospective errors determine motor learning. *Nat Comm* 6:  
414 5925. (2015)
- 415 19. Marinelli L, Crupi D, Di Rocco A, Bove M, Eidelberg D, Abbruzzese G, Ghilardi MF, Learning  
416 and consolidation of visuo-motor adaptation in Parkinson's disease. *Parkinsonism Relat Disord* 15:6-11.  
417 (2009)
- 418 20. Leow LA, de Ruyg A, Loftus AM, Hammond G. Different mechanisms contributing to savings and  
419 anterograde interference are impaired in Parkinson's disease. *Front Hum Neurosci* 7. (2013)
- 420 21. Fernandes HL, Albert MV, Kording KP. Measuring generalization of visuomotor perturbations in  
421 wrist movements using mobile phones. *PLoS ONE* 6: e20290. (2011)
- 422 22. Bedore CD, Livermore J, Lehmann H, Brown LE. Comparing three portable, tablet-based visuomotor  
423 tasks to laboratory versions: An assessment of test validity. *J Concussion* 2: 1-15. (2018)
- 424 23. Fahn S, Elton RL. Unified rating scale for Parkinson's disease . In: Fahn S, Marsden CD, editors,  
425 Recent Developments in Parkinsons Disease, Florham Park. pp. 153-163, 293-304. (1987)
- 426 24. Schenkman M, Zhu CW, Cutson TM, Whetten-Goldstein K. Longitudinal evaluation of economic  
427 and physical impact of Parkinson's disease. *Parkinsonism Relat Disord* 8: 41-50. (2001)
- 428 25. Majsak MJ, Kaminski T, Gentile AM, Flanagan JR. The reaching movements of patients with  
429 Parkinson's disease under self-determined maximal speed and visually cued conditions. *Brain* 121(4):  
430 755-766. (1998)
- 431 26. Semrau JA, Perlmutter JS, Thoroughman KA. Visuomotor adaptation in Parkinson's disease: effects  
432 of perturbation type and medication state. *J Neurophysiol* 111: 2675-2687. (2014)
- 433 27. Miyamoto H, Kawato M, Setoyama T, Suzuki R. Feedback-Error-Learning Neural Network for Tra-  
434 jectory Control of a Robotic Manipulator. *Neural Netw* 1: 251-265. (1988)
- 435 28. Mirdamadi JL. Cerebellar role in Parkinson's disease. *J Neurophysiol* 116: 917-919. (2016)
- 436 29. Hoshi E, Tremblay L, Feger J, Carras PL, Strick PL. The cerebellum communicates with the basal  
437 ganglia. *Nat Neurosci* 8: 1491-1493. (2005)
- 438 30. Izawa J, Shadmehr R. Learning from Sensory and Reward Prediction Errors during Motor Adaptation.  
439 *PLoS Comput Biol* 7. 11 (2011)
- 440 31. Galea JM, Mallia E, Rothwell J, Diedrichsen J. The dissociable effects of punishment and reward on  
441 motor learning. *Nat Neurosci* 18: 597-602. (2015)
- 442 32. Montague PR, Dayan P, Sejnowski TJ. A framework for mesencephalic dopamine systems based on  
443 predictive Hebbian learning. *J Neurosci* 16: 1936-1947. (1996)
- 444 33. Schultz W, Dayan P, Montague PR. A neural substrate of prediction and reward. *Science* 275:  
445 1593-1599. (1997)
- 446 34. Pekny SE, Izawa J, Shadmehr R. Reward-Dependent Modulation of Movement Variability. *J Neurosci*  
447 35: 4015-4024. (2015)
- 448 35. Saito N, Takahata K, Yamakado H, Sawamoto N, Saito S, Takahashi R, Murai T, Takahashi H.  
449 Altered awareness of action in Parkinson's disease: evaluations by explicit and implicit measures. *Sci*  
450 *Rep* 7: 8019. (2017)
- 451 36. Thoroughman KA, Shadmehr R. Learning of action through adaptive combination of motor primi-  
452 tives. *Nature* 407: 742-747. (2000)
- 453 37. Scheidt RA, Dingwell JB, Mussa-Ivaldi FA. Learning to move amid uncertainty. *J Neurophysiol* 86:  
454 971-985. (2001)
- 455 38. Takiyama K, Sakai Y. Balanced motor primitive can explain generalization of motor learning effects  
456 between unimanual and bimanual movements. *Sci Rep* : 1-10. (2016)
- 457 39. Takiyama K. Context-dependent memory decay is evidence of effort minimization in motor learning:  
458 a computational study. *Front Comput Neurosci* 9(4): 1-10. (2015)
- 459 40. Patton JL, Stoykov ME, Kovic M, Mussa-Ivaldi FA. Evaluation of robotic training forces that either  
460 enhance or reduce error in chronic hemiparetic stroke survivors. *Exp Brain Res* 168: 368-383. (2006)

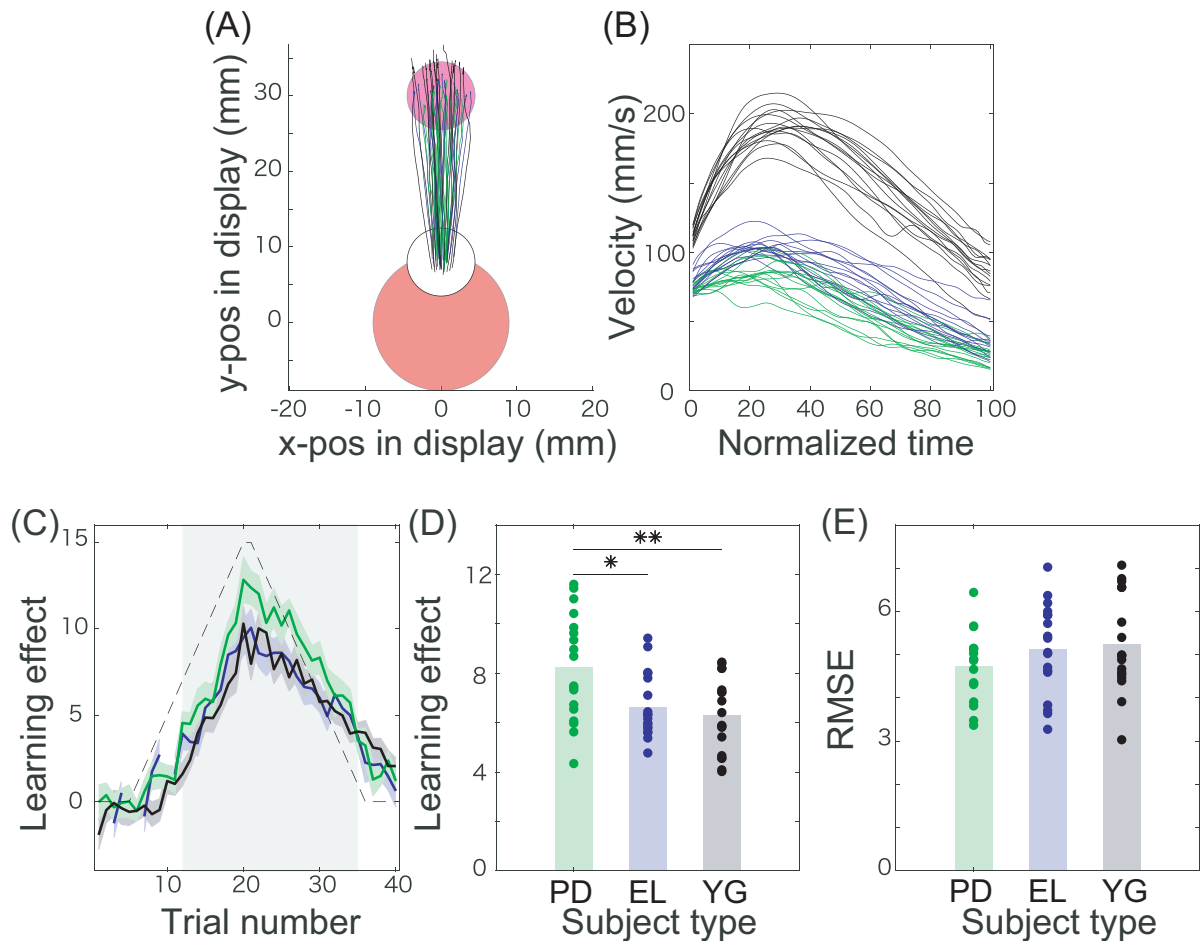

## 461 Figure Legends

462 **Fig. 1** Kinematics and learning curve in the PoMLab experiments. (A): Trajectories displayed on the  
463 tablet monitor. The green, blue, and solid black lines denote the averaged trajectories across the PD  
464 patients, the age- and MMSE-matched elderly individuals, and young individuals, respectively, in every  
465 five trials (N=18 in each group). The red, white, and magenta circles indicate the initial position, the  
466 controlled cursor, and the target, respectively. (B): Measured velocity. The green, blue, and solid black  
467 lines denote the averaged velocities along the y-axis across the PD patients, the age- and MMSE-matched  
468 elderly individuals, and the young individuals, respectively, in every five trials (N=18 in each group). (C):  
469 Learning curves and the perturbation schedule. The horizontal axis denotes the trial number, and the  
470 vertical axis indicates the learning effects or the degree of perturbation (black dotted line). The learning  
471 effects were calculated based on the movement angles at the time when the velocity along the y-axis  
472 reached its maximal value. The green, blue, and solid black lines indicate the learning effects averaged  
473 across the PD patients, the age- and MMSE-matched elderly individuals, and the young individuals,  
474 respectively. The green, blue, and black shaded areas indicate the standard error of the mean for the  
475 learning effects in each group. The gray shaded area denotes the trial number where learning effects in all  
476 the groups are significantly different from zero (t-test  $p < 0.01$  [corrected]). (D): Learning effects averaged  
477 across the trials denoted in the gray shaded area in panel (C). Each dot indicates the learning effects for

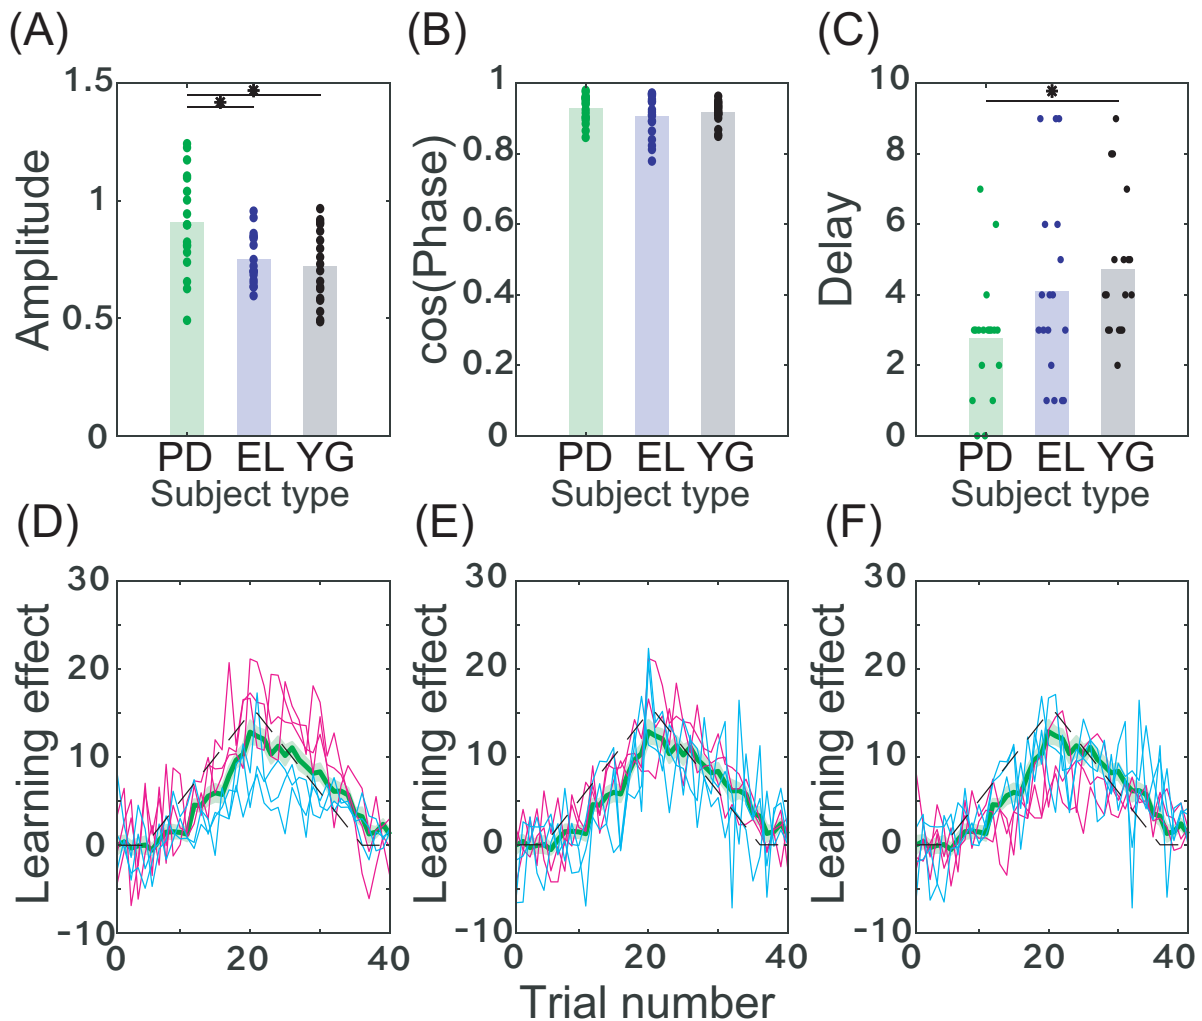

478 each subject. Each bar shows the mean learning effects in each group. \* and \*\* indicate statistically  
 479 significant differences with  $p < 0.05$  and  $p < 0.01$ , respectively (Tukey's post hoc test following one-way  
 480 ANOVA). (E): RMSE averaged across the trials denoted in the gray shaded area in panel (C).

481 **Fig. 2** Learning effects decomposed into three factors. (A): Amplitude in each subject and group.  
 482 A larger value indicates a larger learning effect. Each dot indicates the amplitude for each subject, and  
 483 each bar shows the mean amplitude in each group. \* and \*\* indicate significant differences with  $p <$   
 484  $0.05$  and  $p < 0.01$ , respectively (Tukey's post hoc test following one-way ANOVA). (B): Cosine function  
 485 of the phase for each subject and group. A larger value indicate a smaller phase value, which indicates  
 486 a similar learning curve to the applied perturbation pattern. (C): Delay in each subject and group. A  
 487 larger value indicate a longer delayed response to the applied perturbation. (D): Typical learning curves  
 488 in the PD subjects whose amplitude was the largest, the second largest, the third largest (magenta solid  
 489 lines), the third smallest, the second smallest, and the smallest (cyan solid lines). (E): Typical learning  
 490 curves of the PD patients regarding the cosine function of the phase. (F): Typical learning curves of the  
 491 PD patients regarding delays.

492 **Fig. 3** Kinematic factors possibly relating to the learning effects. (A): Movement time. \*\* indicates



493 a significant difference with  $p < 0.01$  (Tukey's post hoc test following one way ANOVA). (B): Relation  
494 between the normalized movement time and the amplitude of the learning curve. The normalized move-  
495 ment time indicates the modified movement time whose mean and standard deviation are zero and one,  
496 respectively, in each group. There was no correlation between the two variables ( $r=0.1517$ ,  $p=0.2736$ ).  
497 (C): Trajectory error. The horizontal axis indicates the trial number, and the vertical axis indicates  
498 the trajectory error. The trajectory error was calculated as the squared lateral deviation of the cursor  
499 trajectory. The gray shaded area shows the trial numbers where the learning effects were significantly  
500 different from zero (t-test  $p < 0.01$  [corrected]). (D): Trajectory error averaged across the trials in the gray  
501 shaded area in panel (C). There was no difference among the groups ( $p > 0.0697$ , Tukey's post hoc test  
502 following one-way ANOVA).

503 **Fig. 4** Correlation between the learning effects (amplitude and delay) and the clinical scores of  
504 the PD patients. (A-E): The relation between the amplitude and the scores. (F-J): The relationship  
505 between the delay and the scores. There was no significant correlation between the learning effects and  
506 the clinical scores ( $p > 0.1024$  for Pearson's correlation coefficient, and  $p > 0.2075$  for Spearman's rank  
507 correlation coefficient).

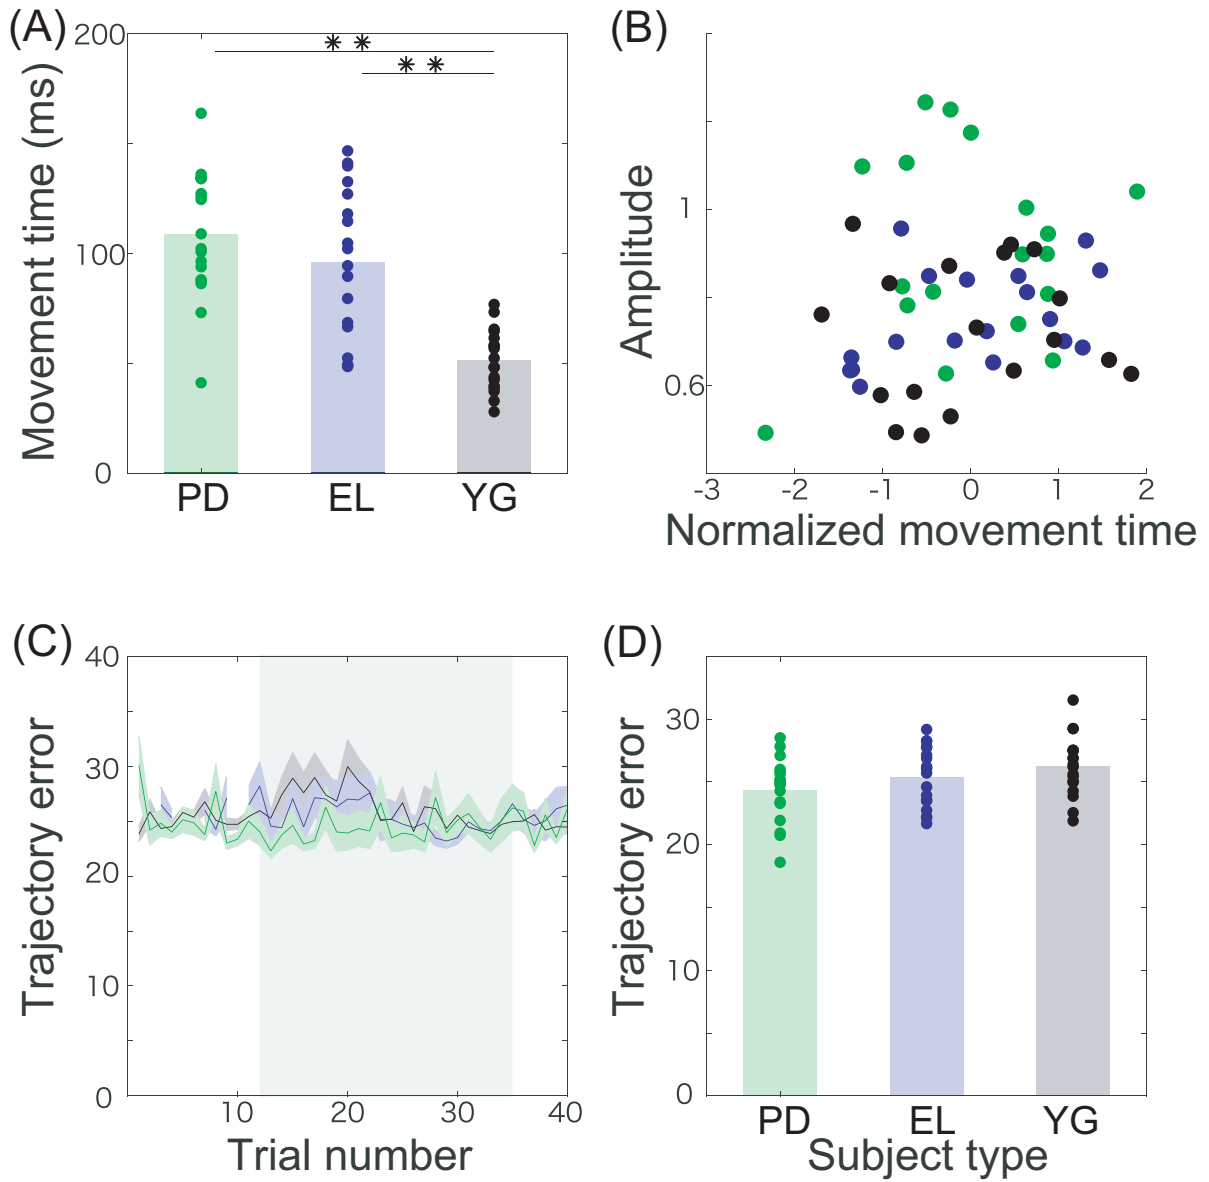

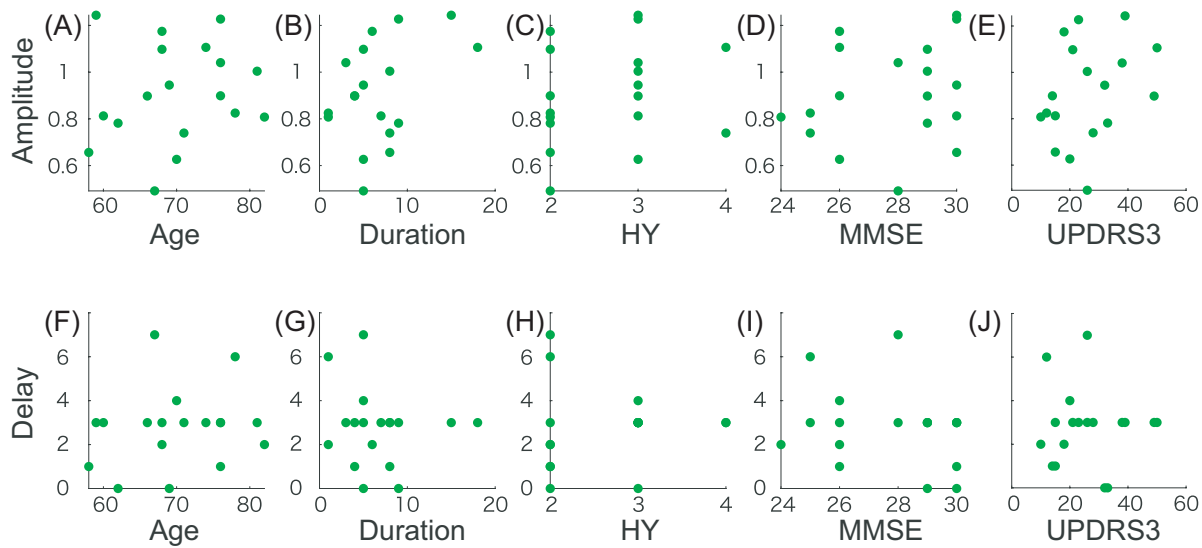

Source: https://biorxiv.org/content/biorxiv/early/2019/07/18/707208.full-text.pdf
